# Supplementary material for: Photocatalytic generation of H2O2 over a Z-scheme Fe2O3@C@1T/2H-MoS2 heterostructured catalyst for high-performance Fenton reaction
Source: Royal Society of Chemistry journal article supplement (doi:10.1039/d2ta08145h), 2022-12-12
Supplement: d2ta08145h1.pdf [file d2ta08145h1.pdf]

## Supporting Information for

### Photocatalytic generation of H<sub>2</sub>O<sub>2</sub> over Z-scheme Fe<sub>2</sub>O<sub>3</sub>@C@1T/2H-MoS<sub>2</sub> heterostructured catalyst for high-performance Fenton reaction

Yang Yang,<sup>a</sup> Qianqian Wang,<sup>a</sup> Xueyong Zhang<sup>b</sup>, Xianhe Deng,<sup>c</sup> Yina Guan,<sup>c</sup> Maoquan Wu,<sup>a</sup> Li Liu,<sup>a</sup> Jie Wu,<sup>c</sup> Tongjie Yao,<sup>\*a,b</sup> Yadong Yin,<sup>\*b</sup>

<sup>a</sup>*State Key Lab Urban Water Resource and Environment, School of Chemistry and Chemical Engineering, Harbin Institute of Technology, Harbin, China*

<sup>b</sup>*Department of Chemistry, University of California, Riverside, CA 92521 USA*

<sup>c</sup>*Key Laboratory of Functional Inorganic Material Chemistry, Ministry of Education, School of Chemistry and Materials Science, Heilongjiang University, Harbin, China*

**Number of Pages: 22**

**Number of Figures: 14**

**Number of Tables: 3**

---

Corresponding authors E-mail: yaotj@hit.edu.cn; yadong.yin@ucr.edu

## Table of Contents

|                                                                                                                              |            |
|------------------------------------------------------------------------------------------------------------------------------|------------|
| <b>Supplementary Figures</b>                                                                                                 | <b>S3</b>  |
| <b>Fig. S1.</b> XRD and Raman spectra                                                                                        | <b>S3</b>  |
| <b>Fig. S2.</b> TEM and SEM images                                                                                           | <b>S4</b>  |
| <b>Fig. S3.</b> Nitrogen adsorption-desorption isotherms                                                                     | <b>S5</b>  |
| <b>Fig. S4.</b> XPS spectrum of Fe <sub>2</sub> O <sub>3</sub> @C@2H-MoS <sub>2</sub>                                        | <b>S6</b>  |
| <b>Fig. S5.</b> Plots of $(ah\nu)^2$ vs. $h\nu$ and VB-XPS spectra of Fe <sub>2</sub> O <sub>3</sub> and 2H-MoS <sub>2</sub> | <b>S7</b>  |
| <b>Fig. S6.</b> Standard curve of H <sub>2</sub> O <sub>2</sub> concentration                                                | <b>S8</b>  |
| <b>Fig. S7.</b> Possible degradation pathway of TC                                                                           | <b>S9</b>  |
| <b>Fig. S8.</b> ESR spectra and CV curves                                                                                    | <b>S11</b> |
| <b>Fig. S9.</b> LSV curves under different rotating speeds                                                                   | <b>S12</b> |
| <b>Fig. S10.</b> H <sub>2</sub> O <sub>2</sub> generation of different catalysts in the presence of AgNO <sub>3</sub>        | <b>S13</b> |
| <b>Fig. S11.</b> LSV and EIS curves under different conditions                                                               | <b>S14</b> |
| <b>Fig. S12.</b> CV and LSV curves of different catalysts without visible light                                              | <b>S15</b> |
| <b>Fig. S13.</b> TEM images of fresh and recycled Fe <sub>2</sub> O <sub>3</sub> @C@1T/2H-MoS <sub>2</sub>                   | <b>S16</b> |
| <b>Fig. S14.</b> XRD patterns of fresh and recycled Fe <sub>2</sub> O <sub>3</sub> @C@1T/2H-MoS <sub>2</sub>                 | <b>S17</b> |
| <b>Supplementary Tables</b>                                                                                                  | <b>S18</b> |
| <b>Table S1.</b> Comparison of production rate of H <sub>2</sub> O <sub>2</sub> with other works                             | <b>S18</b> |
| <b>Table S2.</b> Comparison of the degradation performance with other works                                                  | <b>S19</b> |
| <b>Table S3.</b> Fe <sup>2+</sup> content of different catalysts before and after Fenton reaction                            | <b>S20</b> |
| <b>References in Supporting Information</b>                                                                                  | <b>S21</b> |

## Supplementary Figures

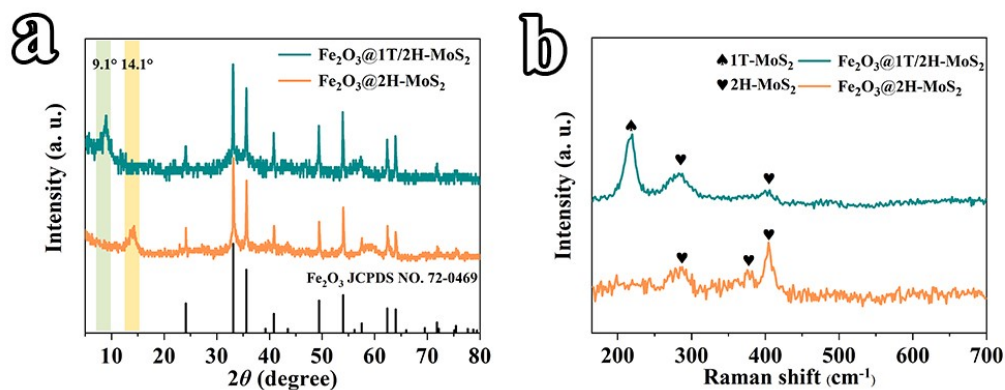

**Fig. S1.** (a) XRD and (b) Raman spectra of Fe<sub>2</sub>O<sub>3</sub>@2H-MoS<sub>2</sub> and Fe<sub>2</sub>O<sub>3</sub>@1T/2H-MoS<sub>2</sub>. After calcination, the 1T-MoS<sub>2</sub> transferred to 2H-MoS<sub>2</sub>.

The XRD pattern of Fe<sub>2</sub>O<sub>3</sub>@1T/2H-MoS<sub>2</sub> is shown in Fig. S1a. Besides the characteristic peaks of Fe<sub>2</sub>O<sub>3</sub>, the peak located at 9.1° corresponds to the (002) facet of 1T-MoS<sub>2</sub>. In the Raman spectrum of Fe<sub>2</sub>O<sub>3</sub>@1T/2H-MoS<sub>2</sub> (Fig. S1b), three peaks appear at 226.4, 284.7, and 406.9 cm<sup>-1</sup>, clearly indicating the mixed 1T- and 2H-phase in the as-prepared sample. After calcination, the peak at 226.4 cm<sup>-1</sup> disappear, while one peak at 381.9 cm<sup>-1</sup> is observed, suggesting the conversion of 1T-phase to 2H-phase. The phase transition of MoS<sub>2</sub> can be further verified by XRD patterns. After calcination, the (002) peak shifts from 9.1° to 14.4° assigned to the (002) facet of 2H-MoS<sub>2</sub>.

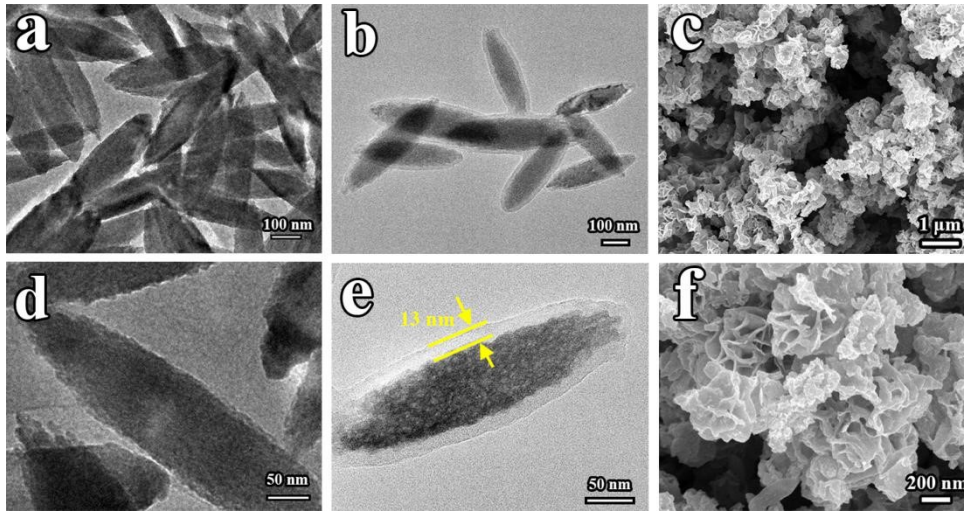

**Fig. S2.** TEM images of (a,d) Fe<sub>2</sub>O<sub>3</sub> and (b,e) Fe<sub>2</sub>O<sub>3</sub>@C. (c,f) SEM images of Fe<sub>2</sub>O<sub>3</sub>@C@1T/2H-MoS<sub>2</sub>.

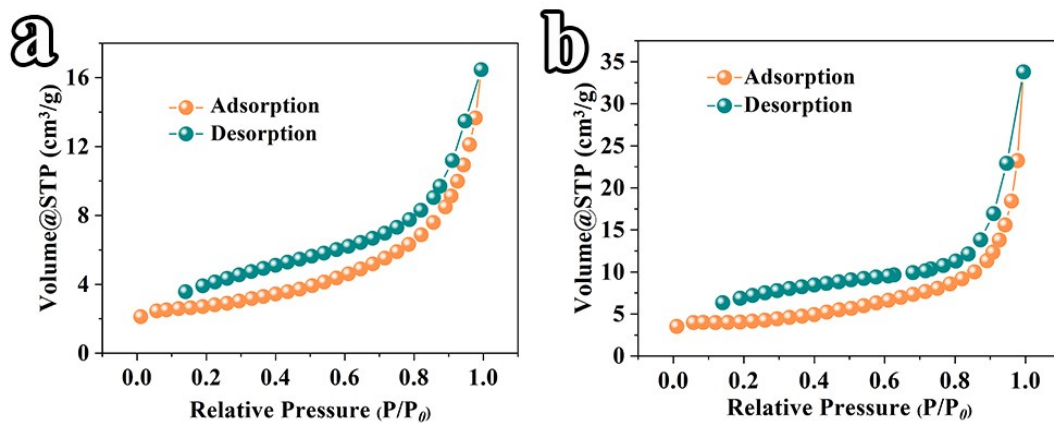

**Fig. S3.** Nitrogen adsorption-desorption isotherms of (a) Fe<sub>2</sub>O<sub>3</sub>@C and (b) Fe<sub>2</sub>O<sub>3</sub>@C@1T/2H-MoS<sub>2</sub>.

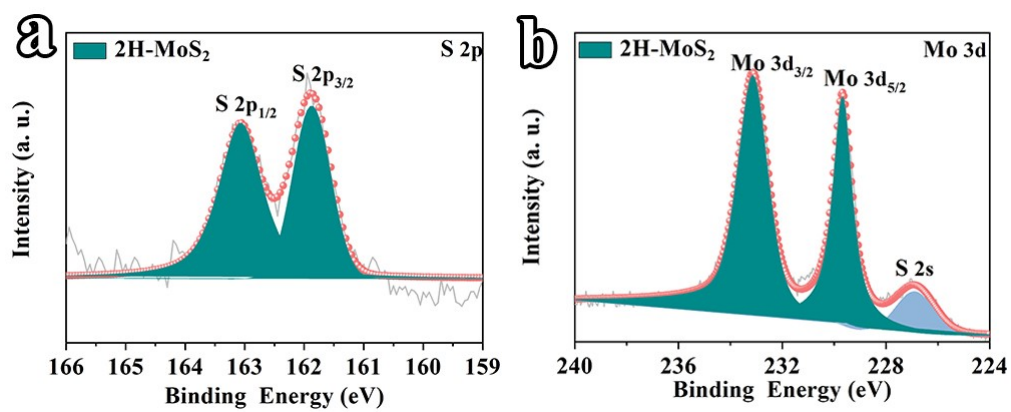

**Fig. S4.** XPS spectrum of Fe<sub>2</sub>O<sub>3</sub>@C@2H-MoS<sub>2</sub>: (a) core-level spectrum of S 2p, and (b) core-level spectrum of Mo 3d.

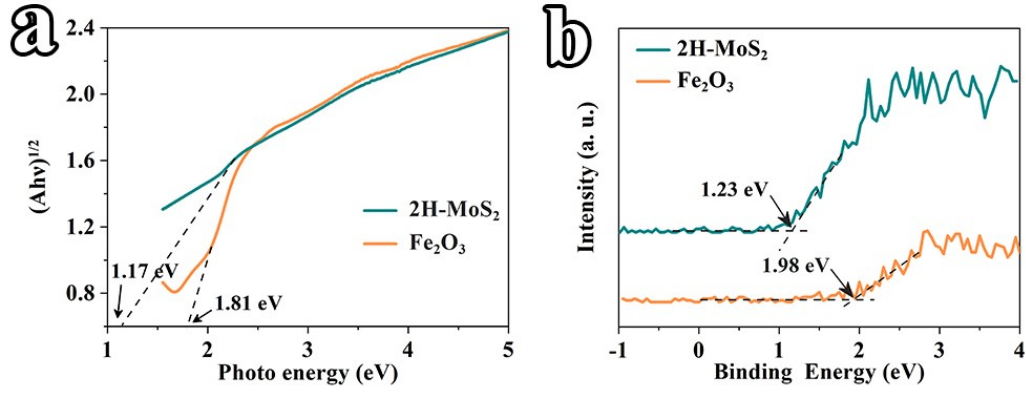

**Fig. S5.** (a) The plots of  $(\alpha hv)^2$  vs.  $hv$  in  $\text{Fe}_2\text{O}_3$  and  $2\text{H-MoS}_2$ . (b) VB-XPS spectra of  $\text{Fe}_2\text{O}_3$  and  $2\text{H-MoS}_2$ .

$$(\alpha hv)^{1/n} = A(hv - E_g) \dots\dots\dots (S1)$$

$$E_{\text{VB}} = E_{\text{CB}} + E_g \dots\dots\dots (S2)$$

The bandgap energy ( $E_g$ ) is determined using Tauc equation (Eq. S1, Fig. S5a), where  $\alpha$ ,  $h$ ,  $\nu$ ,  $A$ , and  $n$  is the absorption coefficient, Planck constant, frequency of light, a constant, and the transition property of the semiconductor (herein,  $n=1/2$ ), respectively.  $E_g$  of  $\text{Fe}_2\text{O}_3$  and  $2\text{H-MoS}_2$  is estimated to be 1.81 and 1.17 eV, respectively. According to the VB-XPS spectra (Fig. S5b), the VB position of  $\text{Fe}_2\text{O}_3$  and  $2\text{H-MoS}_2$  locates at 1.98 and 1.23 eV, and the CB position is calculated to be 0.17 and 0.06 eV (Eq. S2), respectively.

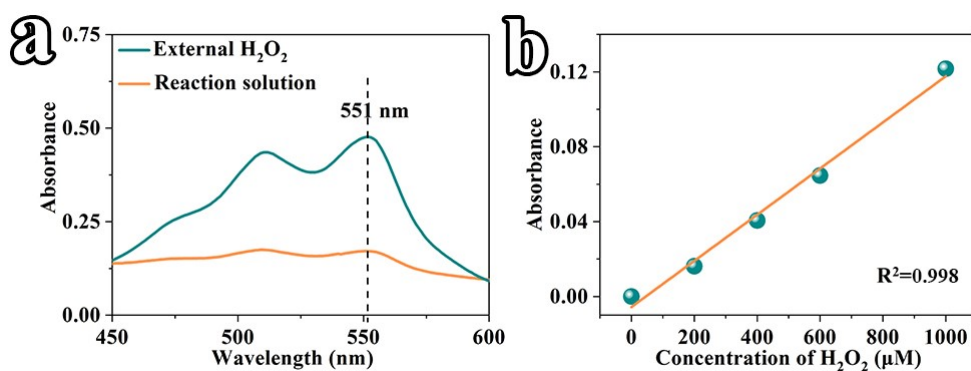

**Fig. S6.** (a) UV-vis spectra of H<sub>2</sub>O<sub>2</sub> solution. (b) Relationship between absorbed intensity and H<sub>2</sub>O<sub>2</sub> concentration.

In a DPD method, the relationship between the absorbed intensity and H<sub>2</sub>O<sub>2</sub> concentration was calibrated according to the peak at 551 nm (Fig. S6a). In the range of 0-1000 μM, the correlation coefficient ( $R^2$ ) was as high as 0.998, suggesting the work curve was reliable (Fig. S6b).



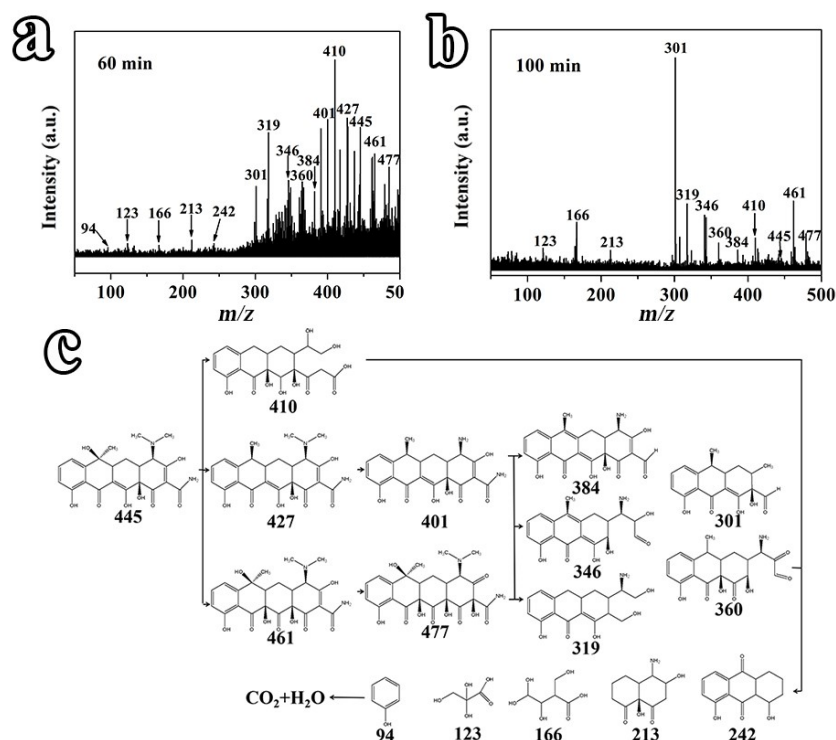

**Fig. S7.** Mass spectra of intermediates in the system of  $\text{Fe}_2\text{O}_3@\text{C}@1\text{T}/2\text{H}-\text{MoS}_2$  after (a) 60 min and (b) 100 min. (c) Possible degradation pathway of TC in PSHFR catalyzed by  $\text{Fe}_2\text{O}_3@\text{C}@1\text{T}/2\text{H}-\text{MoS}_2$ .

The intermediate products of TC in the system of  $\text{Fe}_2\text{O}_3@\text{C}@1\text{T}/2\text{H}-\text{MoS}_2$  were analyzed by HPLC-MS (Fig. S7). The signal of TC ( $m/z=445$ ) is still detected after 60 min and almost disappears after 100 min (Figs. S7a-b). The possible degradation pathway of TC is shown in Fig. S7c. Under the attack of radicals, initial TC is oxidized to the compounds ( $m/z=410$ , 427, and 461) via dealkylation, dehydroxylation, and hydroxylation. An intermediate ( $m/z=401$  or 477) is obtained via additional reaction between  $\cdot\text{OH}$  and TC, further evidencing  $\cdot\text{OH}$  is a main radical. Moreover, the signal of the characteristic intermediate ( $m/z=414$ ) via reaction between TC and  $\cdot\text{O}_2^-$  is invisible, further verifying the minor contribution of  $\cdot\text{O}_2^-$ . Next, the intermediates ( $m/z=401$  and 477) undergo the dealkylation and hydroxylation

reactions, and the molecules with the lower molecule weight ( $m/z=384, 346, 319, 301,$   
and  $360$ ) are produced. A ring-opening reaction directly occurs on the intermediate  
( $m/z=410$ ), and organics ( $m/z=242, 213, 166, 123,$  and  $94$ ) are formed and mineralized  
to  $\text{CO}_2$  and  $\text{H}_2\text{O}$ .

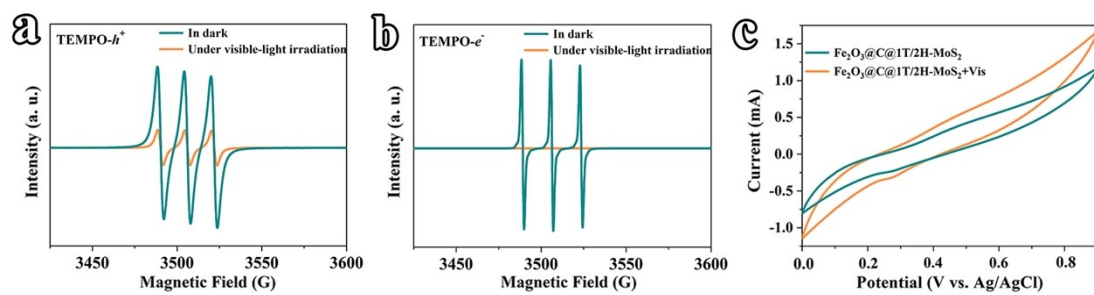

**Fig. S8.** ESR spectra for (a) TEMPO- $h^+$  and (b) TEMPO- $e^-$ ; (c) CV curves of  $\text{Fe}_2\text{O}_3@\text{C}@1\text{T}/2\text{H-MoS}_2$  in dark or under visible light illumination.

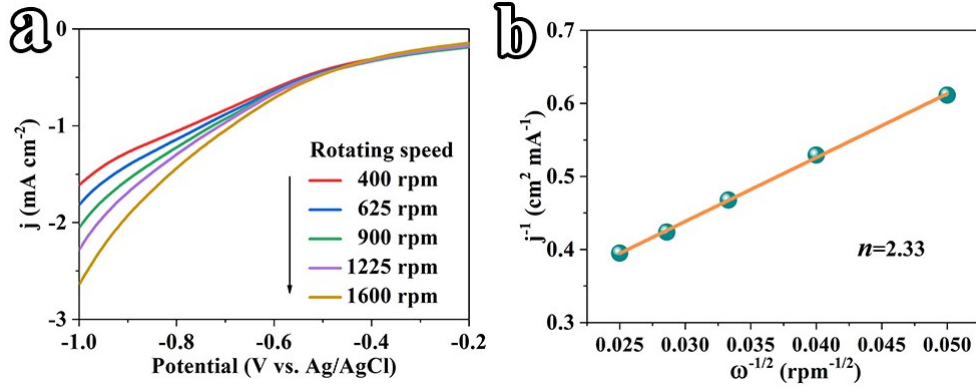

**Fig. S9.** (a) LSV curves of Fe<sub>2</sub>O<sub>3</sub>@C@1T/2H-MoS<sub>2</sub> under different rotating speeds; (b) Koutecky-Levich plots of the data obtained at the constant electrode potential (-1.0 V vs. Ag/AgCl).

$$j^{-1} = j_k^{-1} + B^{-1}\omega^{-1/2} \quad \text{.....(S3)}$$

$$B = 0.2nF\nu^{-1/6}CD^{2/3} \quad \text{.....(S4)}$$

In Fig. S9a, LSV curve of Fe<sub>2</sub>O<sub>3</sub>@C@1T/2H-MoS<sub>2</sub> is measured in an O<sub>2</sub>-saturated phosphate buffer solution (0.1 mol L<sup>-1</sup>) at different rotating speeds, and the corresponding Koutecky-Levich plots of the data at -1.0 V vs. Ag/AgCl is shown in Fig. S9b. The average number of electrons (*n*) involved in reduction of O<sub>2</sub> was obtained by the linear regression of the plots (Eqs. S3-S4), where *j*, *j<sub>k</sub>*, ω, *F*, *ν*, *C*, and *D* was the current density, the kinetic current density, the rotating speed, the Faraday constant (96,485 C mol<sup>-1</sup>), the kinetic viscosity of water (0.01 cm<sup>2</sup> s<sup>-1</sup>), the bulk concentration of O<sub>2</sub> in water (1.26×10<sup>-3</sup> mol cm<sup>-3</sup>), and the diffusion coefficient of O<sub>2</sub> (2.7×10<sup>-5</sup> cm<sup>2</sup> s<sup>-1</sup>), respectively.

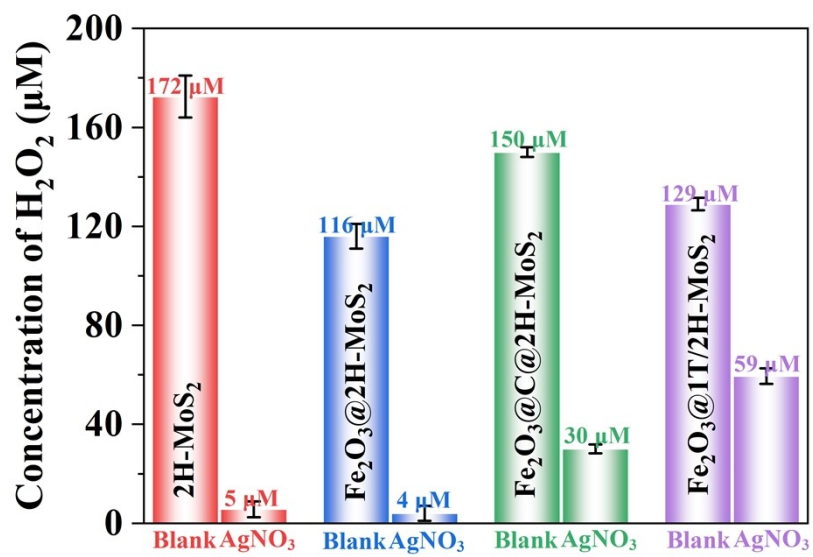

*Fig. S10.* H<sub>2</sub>O<sub>2</sub> generation of different catalysts in the presence of AgNO<sub>3</sub>.

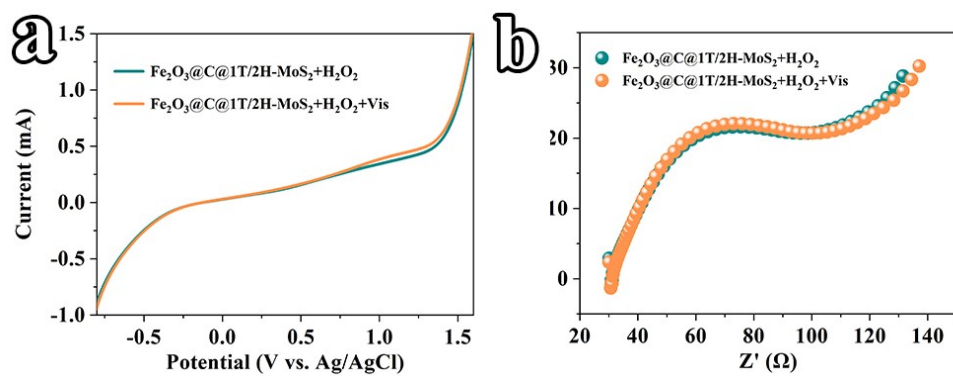

**Fig. S11.** (a) LSV and (b) EIS curves of  $\text{Fe}_2\text{O}_3@\text{C}@1\text{T}/2\text{H-MoS}_2$  under different conditions.

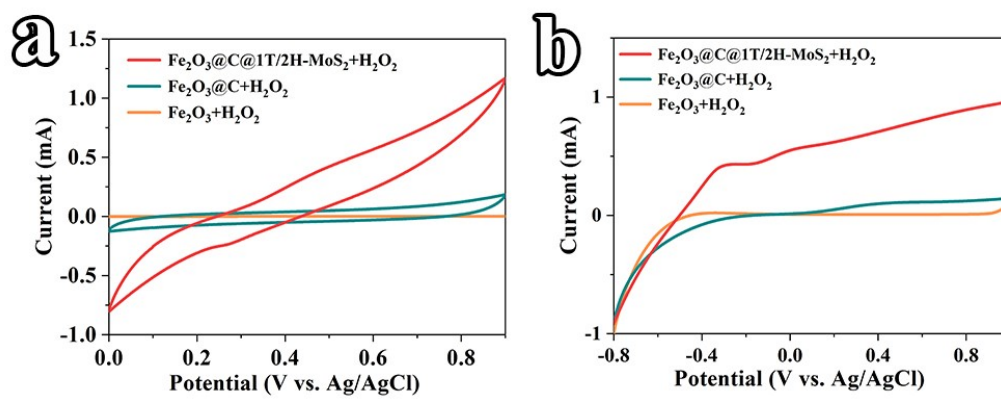

**Fig. S12.** (a) CV and (b) LSV curves of different catalysts with external  $\text{H}_2\text{O}_2$ .

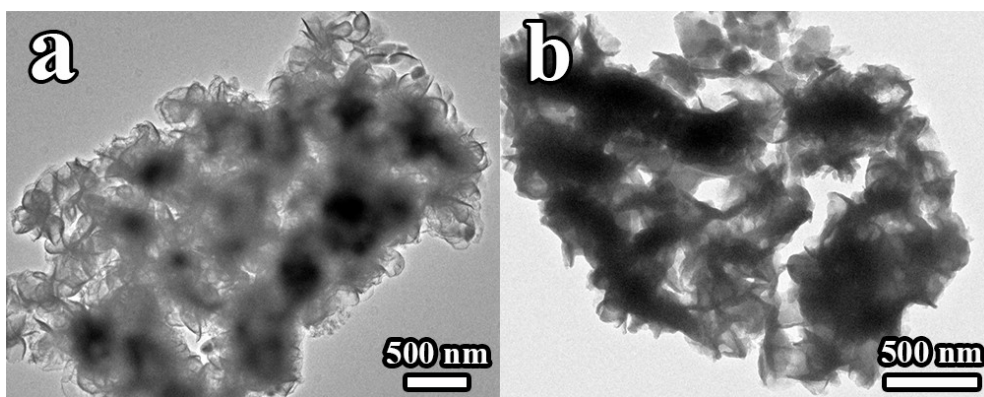

**Fig. S13.** TEM images of (a) fresh  $\text{Fe}_2\text{O}_3@\text{C}@1\text{T}/2\text{H}-\text{MoS}_2$  and (b) recycled  $\text{Fe}_2\text{O}_3@\text{C}@1\text{T}/2\text{H}-\text{MoS}_2$ .



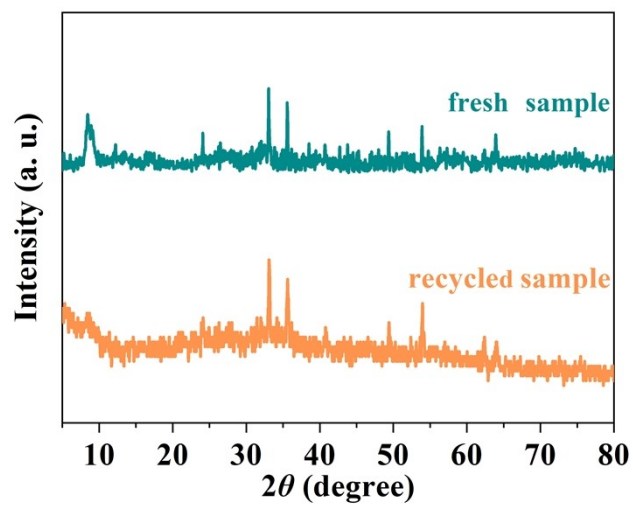

*Fig. S14.* XRD patterns of  $\text{Fe}_2\text{O}_3@\text{C}@1\text{T}/2\text{H-MoS}_2$  before and after reaction.

## Supplementary Tables

**Table S1.** Comparison of production rate of H<sub>2</sub>O<sub>2</sub> with other works.

| Catalysts <sup>a</sup>                                            | Catalyst dosage (g/L) | Atmosphere                | Reaction solution <sup>b</sup> | Light source | pH  | H <sub>2</sub> O <sub>2</sub> production activity (μmol/g/h) | Ref. |
|-------------------------------------------------------------------|-----------------------|---------------------------|--------------------------------|--------------|-----|--------------------------------------------------------------|------|
| Fe <sub>2</sub> O <sub>3</sub> @MoS <sub>2</sub> @Ag              | 1.0                   | Air                       | Water (50 mL)                  | Vis          | /   | 95                                                           | [1]  |
| Au@MoS <sub>2</sub>                                               | 1.0                   | Air                       | Water (50 mL)                  | Vis          | 5.0 | 54                                                           | [2]  |
| N-defective g-C <sub>3</sub> N <sub>4</sub>                       | 1.0                   | Air                       | Water (20 mL)                  | Vis          | 3.0 | 211                                                          | [3]  |
| g-C <sub>3</sub> N <sub>4</sub> @MoS <sub>2</sub>                 | 0.4                   | Air                       | Water (50 mL)                  | UV-Vis       | /   | 300                                                          | [4]  |
| O/K-CN                                                            | 0.5                   | O <sub>2</sub> -saturated | 10 vol% IPA (50 mL)            | Vis          | /   | 1547                                                         | [5]  |
| Ag@U-g-C <sub>3</sub> N <sub>4</sub> -NS                          | 1.0                   | O <sub>2</sub> -saturated | Water (100 mL)                 | Vis          | 3.0 | 45                                                           | [6]  |
| 1T-MoS <sub>2</sub> /g-C <sub>3</sub> N <sub>4</sub>              | 0.1                   | Air                       | IPA (50 mL)                    | UV-Vis       | 7.0 | 440                                                          | [7]  |
| SCN                                                               | 0.5                   | Air                       | 10 vol% IPA (40 mL)            | Vis          | 5.8 | 28                                                           | [8]  |
| Ultrathin g-C <sub>3</sub> N <sub>4</sub>                         | 1.0                   | O <sub>2</sub> -saturated | 5 vol% EtOH (50 mL)            | UV-Vis       | /   | 1083                                                         | [9]  |
| Ti <sub>3</sub> C <sub>2</sub> @g-C <sub>3</sub> N <sub>4</sub>   | 1.0                   | O <sub>2</sub> -saturated | 10 vol% IPA (50 mL)            | Vis          | /   | 132                                                          | [10] |
| g-C <sub>3</sub> N <sub>4</sub>                                   | 0.5                   | O <sub>2</sub> -saturated | 10 vol% IPA (100 mL)           | Vis          | /   | 574                                                          | [11] |
| OCN                                                               | 1.0                   | O <sub>2</sub> -saturated | 10 vol% IPA (100 mL)           | Vis          | 7.0 | 1200                                                         | [12] |
| Ag <sub>3</sub> PO <sub>4</sub> @NiFe <sub>2</sub> O <sub>4</sub> | 0.3                   | Air                       | 75 vol% MeOH (50 mL)           | Vis          | /   | 150                                                          | [13] |
| Ni-CAT-CN <sub>60</sub>                                           | 0.7                   | Air                       | Water (15 mL)                  | Vis          | /   | 1801                                                         | [14] |
| Cv@g-C <sub>3</sub> N <sub>4</sub>                                | 1.0                   | O <sub>2</sub> -saturated | 10 vol% EtOH (10 mL)           | Vis          | /   | 7.0                                                          | [15] |
| Fe <sub>2</sub> O <sub>3</sub> @C@1T/2H-MoS <sub>2</sub>          | 0.2                   | Air                       | 75 vol% MeOH (50 mL)           | Vis          | 6.5 | 1575                                                         | here |

<sup>a</sup>O/K-CN = oxygen and potassium dual-heteroatom incorporated polymeric carbon nitride, U-g-C<sub>3</sub>N<sub>4</sub>-NS = ultrathin g-C<sub>3</sub>N<sub>4</sub> nanosheets, SN-GQD = sulfur and nitrogen co-doped graphene quantum dots, SCN = SnO<sub>2</sub>-coupled and cyano modified g-C<sub>3</sub>N<sub>4</sub>, OCN = oxygen-enriched graphitic carbon nitride polymers, Ni-CAT-CN<sub>60</sub> = C<sub>3</sub>N<sub>4</sub> assisted Ni<sub>3</sub>(HHTP)<sub>2</sub>, Cv = cyano group; <sup>b</sup>IPA = isopropanol, EtOH = ethanol.

**Table S2.** Comparison of the degradation performance with other works.

| Catalysts <sup>a</sup>                                              | Catalyst dosage (g/L) | Light source | Pollutants <sup>b</sup> | pH   | Amount                           | Removal time       | Ref. |
|---------------------------------------------------------------------|-----------------------|--------------|-------------------------|------|----------------------------------|--------------------|------|
| Fe <sub>2</sub> O <sub>3</sub> /MoS <sub>2</sub> /Ag                | 1.0                   | Vis          | 2,4-DCP                 | 5.0  | 30 mL,<br>10 mg L <sup>-1</sup>  | 150 min<br>(99.0%) | [1]  |
| Fe <sub>2</sub> O <sub>3</sub> /MoS <sub>2</sub>                    | 0.3                   | UV-Vis       | MB                      | 4.0  | 30 mL,<br>20 mg L <sup>-1</sup>  | 20 min<br>(97.0%)  | [16] |
| RGO-Fe <sub>2</sub> O <sub>3</sub> -MoS <sub>2</sub>                | 0.1                   | Vis          | MB                      | /    | 50 mL,<br>10 mg L <sup>-1</sup>  | 50 min<br>(98.0%)  | [17] |
| Fe <sub>2</sub> O <sub>3</sub> /ACN                                 | 0.5                   | UV-Vis       | OTC                     | 9.0  | 100 mL,<br>30 mg L <sup>-1</sup> | 120 min<br>(92.6%) | [18] |
| Fe <sub>2</sub> O <sub>3</sub> @PPy/PB                              | 0.2                   | Vis          | TC                      | 6.5  | 50 mL,<br>50 mg L <sup>-1</sup>  | 35 min<br>(21.3%)  | [19] |
| Fe <sub>2</sub> O <sub>3</sub> /CeO <sub>2</sub>                    | 0.06                  | Vis          | TC                      | 13.0 | 50 mL,<br>30 mg L <sup>-1</sup>  | 60 min<br>(88.6%)  | [20] |
| rGO/Fe <sub>2</sub> O <sub>3</sub> /g-C <sub>3</sub> N <sub>4</sub> | 1.0                   | Vis          | TC                      | 7.0  | 100 mL,<br>50 mg L <sup>-1</sup> | 40 min<br>(≈98.0%) | [21] |
| BiVO <sub>4</sub> /α-Fe <sub>2</sub> O <sub>3</sub>                 | 0.5                   | Vis          | TC                      | /    | 100 mL,<br>20 mg L <sup>-1</sup> | 120 min<br>(75.8%) | [22] |
| g-C <sub>3</sub> N <sub>4</sub> /MoS <sub>2</sub> /graphene         | 0.3                   | Vis          | TC                      | /    | 60 mL,<br>1.0 mg L <sup>-1</sup> | 60 min<br>(69.0%)  | [23] |
| MoS <sub>2</sub> /ZnSnO <sub>3</sub>                                | 0.5                   | Vis          | TC                      | /    | 50 mL,<br>30 mg L <sup>-1</sup>  | 60 min<br>(80.2%)  | [24] |
| NiSe <sub>2</sub> /MoS <sub>2</sub>                                 | 0.6                   | Solar        | TC                      | /    | 50 mL,<br>20 mg L <sup>-1</sup>  | 120 min<br>(58.1%) | [25] |
| MnFe <sub>2</sub> O <sub>4</sub> -Au                                | 0.1                   | Vis          | TC                      | 6.0  | 100 mL,<br>20 mg L <sup>-1</sup> | 90 min<br>(88.3%)  | [26] |
| Fe <sub>2</sub> O <sub>3</sub> @C@1T/2H-MoS <sub>2</sub>            | 0.2                   | Vis          | TC                      | 6.5  | 50 mL,<br>100 mg L <sup>-1</sup> | 100 min<br>(91.5%) | here |

<sup>a</sup>RGO = reduced graphene oxide, ACN = cyclized carbon nitride, PPy = polypyrrole, PB = Prussian blue; <sup>b</sup>MB = methyl blue, 2,4-DCP = 2,4-dichlorophenol, RhB = Rhodamine B, OTC = oxytetracycline.

**Table S3.** Fe<sup>2+</sup> content of different catalysts before and after Fenton reaction. The amount of external H<sub>2</sub>O<sub>2</sub> was equal to the yield over Fe<sub>2</sub>O<sub>3</sub>@C@1T/2H-MoS<sub>2</sub> within 100 min.

| Catalysts                                                | Fresh sample | Recycled sample |
|----------------------------------------------------------|--------------|-----------------|
| Fe <sub>2</sub> O <sub>3</sub>                           | 7.0%         | 3.1%            |
| Fe <sub>2</sub> O <sub>3</sub> @C                        | 21.2%        | 24.0%           |
| Fe <sub>2</sub> O <sub>3</sub> @C@1T/2H-MoS <sub>2</sub> | 23.0%        | 27.8%           |

## References in Supporting Information

- [1] M. J. Guo, Z. P. Xing, T. Y. Zhao, Y. L. Qiu, B. Tao, Z. Z. Li, W. Zhou, *Appl. Catal. B: Environ.* **2020**, 272, 118978.
- [2] H. Y. Song, L. S. Wei, C. X. Chen, C. C. Wen, F. Q. Han, *J. Catal.* **2019**, 376, 198-208.
- [3] X. Zhang, P. J. Ma, C. Wang, L. Y. Gan, X. J. Chen, P. Zhang, Y. Wang, H. Li, L. H. Wang, X. Y. Zhou, K. Zheng, *Energy Environ. Sci.* **2022**, 15, 830.
- [4] L. Z. Qin, Y. Z. Lin, Y. C. Dou, Y. J. Yang, K. Li, T. Li, F. T. Liu, *Nanoscale* **2020**, 12, 13829.
- [5] W. Liu, P. F. Wang, J. Chen, X. Gao, H. N. Che, B. Liu, Y. H. Ao, *Adv. Funct. Mater.* **2022**, 2205119.
- [6] J. S. Cai, J. Y. Huang, S. C. Wang, J. Iocozzia, Z. T. Sun, J. Y. Sun, Y. K. Yang, Y. K. Lai, Z. Q. Lin, *Adv. Mater.* **2019**, 31, 1806314.
- [7] X. Y. Hu, X. K. Zeng, Y. Liu, J. Lu, S. Yuan, Y. C. Yin, J. Hu, D. T. McCarthy, X. W. Zhang, *Appl. Catal. B: Environ.* **2020**, 268, 118466.
- [8] C. C. Chu, W. Miao, Q. J. Li, D. D. Wang, Y. Liu, S. Mao, *Chem. Eng. J.* **2022**, 428, 132531.
- [9] L. Zhou, J. R. Feng, B. C. Qiu, Y. Zhou, J. Y. Lei, M. Y. Xing, L. Z. Wang, Y. B. Zhou, Y. D. Liu, J. L. Zhang, *Appl. Catal. B: Environ.* **2020**, 267, 118396.
- [10] Y. Yang, Z. T. Zeng, G. M. Zeng, D. L. Huang, R. Xiao, C. Zhang, C. Y. Zhou, W. P. Xiong, W. J. Wang, M. Cheng, W. J. Xue, H. Guo, X. Tang, D. H. He, *Appl. Catal. B: Environ.* **2019**, 258, 117956.
- [11] C. Y. Feng, L. Tang, Y. C. Deng, J. J. Wang, J. Luo, Y. N. Liu, X. L. Ouyang, H. R. Yang, J. F. Yu, J. J. Wang, *Adv. Funct. Mater.* **2020**, 2001922.
- [12] Z. Wei, M. L. Liu, Z. J. Zhang, W. Q. Yao, H. W. Tan, Y. F. Zhu, *Energy Environ. Sci.* **2018**, 11, 2581.
- [13] S. Q. Huang, Y. G. Xu, T. Zhou, M. Xie, Y. Ma, Q. Q. Liu, L. Q. Jing, H. Xu, H. M. Li, *Appl. Catal. B: Environ.* **2018**, 225, 40-50.
- [14] Y. J. Zhao, Y. Liu, Z. Z. Wang, Y. R. Ma, Y. J. Zhou, X. F. Shi, Q. Y. Wu, X. Wang, M. W. Shao, H. Huang, Y. Liu, Z. H. Kang, *Appl. Catal. B: Environ.* **2021**, 289, 120035.
- [15] L. Chen, C. Chen, Z. Yang, S. Li, C. H. Chu, B. L. Chen, *Adv. Funct. Mater.* **2021**, 31, 2105731.
- [16] S. Wang, B. W. Tang, W. L. Yang, F. M. Wu, G. Y. Zhang, B. Zhao, X. J. He, Y. Q. Yang, J. X. Jiang, *J. Alloy. Compd.* **2019**, 784, 1099-1105.
- [17] L. X. Chen, F. He, N. Q. Zhao, R. S. Guo, L. X. Chen, F. He, N. Q. Zhao, R. S. Guo, *Appl. Surf. Sci.* **2017**, 420, 669-680.
- [18] Y. P. Li, J. Han, K. L. Liu, J. H. Li, H. X. Zhang, J. X. Chen, *Sep. Purif. Technol.* **2022**, 290, 120790.
- [19] Y. Yang, S. C. Ma, J. P. Qu, J. Q. Li, Y. Liu, Q. Q. Wang, J. Jing, Y. Yuan, T. J. Yao, J. Wu, *J. Hazard. Mater.* **2021**, 405, 124668.
- [20] S. He, C. Yan, X. Z. Chen, Z. Wang, T. Ouyang, M. L. Guo, Z. Q. Liu, *Appl. Catal. B: Environ.* **2020**, 276, 119138.

- [21] S. Shanavas, S. M. Roopan, A. Priyadharsan, D. Devipriya, S. Jayapandi, R. Acevedo, P. M. Anbarasan, *Appl. Catal. B: Environ.* **2019**, 255, 117758.
- [22] C. C. Ma, J. Lee, Y. Kim, W. C. Seo, H. Jung, W. Yang, *J. Colloid Interf. Sci.* **2021**, 581, 514522.
- [23] H. W. Tian, M. Liu, W. T. Zheng, *Appl. Catal. B: Environ.* **2018**, 225, 468-476.
- [24] F. Guo, X. L. Huang, Z. H. Chen, H. J. Ren, M. Y. Li, L. Z. Chen, *J. Hazard. Mater.* **2020**, 390, 122158.
- [25] J. Jia, L. S. Zheng, K. K. Li, Y. T. Zhang, H. J. Xie, *Chem. Eng. J.* **2022**, 429, 132432.
- [26] L. Qin, Z. H. Wang, Y. K. Fu, C. Lai, X. G. Liu, B. S. Li, S. Y. Liu, H. Yi, L. Li, M. M. Zhang, Z. W. Li, W. C. Cao, Q. Y. Niu, *J. Hazard. Mater.* **2021**, 414, 125448.
